# Supplementary material for: Multi‐family therapy for eating disorders: A systematic scoping review of the quantitative and qualitative findings
Source: PubMed Central journal article supplement (PMC9298280; doi:10.1002/eat.23616), 2021-10-20
Supplement: EAT-54-2095-s001.pdf [file EAT-54-2095-s001.pdf]

Supplementary Material 1 | Search Terms and Strategy

Main Databases: Embase, Medline, PsycInfo, Central

Search Date: 24<sup>th</sup> June, 2021

| <i>Concept</i>       | <b>Databases: PsycInfo, Embase, Medline</b>                                                                                                                                                                                                    | <b>Database: CENTRAL (Cochrane)</b>             |
|----------------------|------------------------------------------------------------------------------------------------------------------------------------------------------------------------------------------------------------------------------------------------|-------------------------------------------------|
| Eating Disorders     | 1. Eating Disorders/ (explode)                                                                                                                                                                                                                 | 1. Eating Disorders/ (explode)                  |
|                      | 2. Eating disorder*.mp                                                                                                                                                                                                                         | 2. Eating disorder*                             |
|                      | 3. (feeding and eating disorder*).mp                                                                                                                                                                                                           | 3. feeding and eating disorder*                 |
|                      | 4. (feeding adj3 eating disorder*).mp                                                                                                                                                                                                          | 4. feeding NEAR/3 eating disorder*              |
|                      | 5. Appetite disorder*.mp                                                                                                                                                                                                                       | 5. Appetite disorder*                           |
|                      | 6. feeding disorder*.mp                                                                                                                                                                                                                        | 6. feeding disorder*                            |
|                      | 7. (eating and feeding disorder*).mp                                                                                                                                                                                                           | 7. eating and feeding disorder*                 |
|                      | 8. (eating adj3 feeding disorder*).mp                                                                                                                                                                                                          | 8. eating NEAR/3 feeding disorder*              |
|                      | 9. (restrict* adj3 eat*).mp                                                                                                                                                                                                                    | 9. restrict* NEAR/3 eat*                        |
|                      | 10. Anorexi*.mp                                                                                                                                                                                                                                | 10. Anorexi*                                    |
|                      | 11. Bulimi*.mp                                                                                                                                                                                                                                 | 11. Bulimi*                                     |
|                      | 12. ARFID.mp                                                                                                                                                                                                                                   | 12. ARFID                                       |
|                      | 13. Avoidant restrictive food intake disorder.mp                                                                                                                                                                                               | 13. Avoidant restrictive food intake disorder   |
|                      | 14. Bing*.mp                                                                                                                                                                                                                                   | 14. Bing*                                       |
|                      | 15. Purg*.mp                                                                                                                                                                                                                                   | 15. Purg*                                       |
|                      | 16. Night eating syndrome.mp                                                                                                                                                                                                                   | 16. Night eating syndrome                       |
|                      | 17. (Rumination adj3 disorder*).mp                                                                                                                                                                                                             | 17. Rumination NEAR/3 disorder*                 |
|                      | 18. (Rumination adj3 syndrome).mp                                                                                                                                                                                                              | 18. Rumination NER/3 syndrome                   |
|                      | 19. Pica.mp                                                                                                                                                                                                                                    | 19. Pica                                        |
|                      | 20. allotriophagy.mp.                                                                                                                                                                                                                          | 20. allotriophagy                               |
|                      | 21. geophag*.mp                                                                                                                                                                                                                                | 21. geophag*                                    |
|                      | 22. (Other specified feeding and eating disorder).mp                                                                                                                                                                                           | 22. Other specified feeding and eating disorder |
|                      | 23. OSFED.mp                                                                                                                                                                                                                                   | 23. OSFED                                       |
|                      | 24. (Unspecified feeding and eating disorder).mp                                                                                                                                                                                               | 24. Unspecified feeding and eating disorder     |
|                      | 25. UFED.mp                                                                                                                                                                                                                                    | 25. UFED                                        |
|                      | 26. (Eating disorder not otherwise specified).mp                                                                                                                                                                                               | 26. Eating disorder not otherwise specified     |
|                      | 27. EDNOS.mp                                                                                                                                                                                                                                   | 27. EDNOS                                       |
| Multi-Family Therapy | 28. Multifamil*                                                                                                                                                                                                                                | 28. Multifamil*                                 |
|                      | 29. Mult*?famil*                                                                                                                                                                                                                               | 29. Mult*famil*                                 |
|                      | 30. Mult* adj2 famil*                                                                                                                                                                                                                          | 30. Mult* NEAR/2 famil*                         |
|                      | 31. Famil* adj1 group*                                                                                                                                                                                                                         | 31. Famil* NEAR/1 group*                        |
|                      | 32. MFT                                                                                                                                                                                                                                        | 32. MFT                                         |
|                      | 33. MFTG                                                                                                                                                                                                                                       | 33. MFTG                                        |
|                      | 34. MFG                                                                                                                                                                                                                                        | 34. MFG                                         |
|                      | 35. MFGT                                                                                                                                                                                                                                       | 35. MFGT                                        |
| Search               | (#1 OR #2 OR #3 OR #4 OR #5 OR #6 OR #7 OR #8 OR #9 OR #10 OR #11 #12 OR #13 OR #14 OR #15 OR #16 OR #17 OR #18 #19 OR #20 OR #21 OR #22 OR #23 OR #24 OR #25 OR #26 OR #27) <b>AND</b> (#28 OR #29 OR #30 OR #31 OR #32 OR #33 OR #34 OR #35) |                                                 |

Abbreviations: mp=title, abstract, heading word, table of contents, key concepts, original title, tests & measures, mesh

| Database                                          | Search Terms                                                                                                                                                                                                                                                                                                                                                                                                                                                                                                                                                                                                                                                                                                                                                                                                                                                                                                              |
|---------------------------------------------------|---------------------------------------------------------------------------------------------------------------------------------------------------------------------------------------------------------------------------------------------------------------------------------------------------------------------------------------------------------------------------------------------------------------------------------------------------------------------------------------------------------------------------------------------------------------------------------------------------------------------------------------------------------------------------------------------------------------------------------------------------------------------------------------------------------------------------------------------------------------------------------------------------------------------------|
| ETHos UK<br>Theses online                         | Multifamily OR Multi-family OR Multi family OR Multiple-family OR Multiple family                                                                                                                                                                                                                                                                                                                                                                                                                                                                                                                                                                                                                                                                                                                                                                                                                                         |
| OpenGrey.eu                                       | ( Eating disorder* OR Feeding and eating disorder* OR feeding NEAR/3 eating disorder* OR Appetite disorder* OR feeding disorder* OR eating and feeding disorder* OR eating NEAR/3 feeding disorder* OR restrict* NEAR/3 eat* OR anorexi* OR bulimi* OR arfid OR "Avoidant restrictive food intake disorder" OR bing* OR purg* OR "Night eating syndrome" OR Rumination NEAR/3 disorder* OR Rumination NEAR/3 syndrome OR pica OR allotriophagy OR geophag* OR "Other specified feeding and eating disorder" OR osfed OR "Unspecified feeding and eating disorder" OR ufed OR "Eating disorder not otherwise specified" OR ednos ) <b>AND</b> ( multifamil* OR mult*famil* OR mult* NEAR/2 famil* OR famil* NEAR/1 group* OR mft OR mftg OR mfg OR mfgt )                                                                                                                                                                  |
| ProQuest<br>Dissertations<br>and Theses<br>Global | noft(( Eating disorder* OR Feeding and eating disorder* OR feeding NEAR/3 eating disorder* OR Appetite disorder* OR feeding disorder* OR eating and feeding disorder* OR eating NEAR/3 feeding disorder* OR restrict* NEAR/3 eat* OR anorexi* OR bulimi* OR arfid OR "Avoidant restrictive food intake disorder" OR bing* OR purg* OR "Night eating syndrome" OR Rumination NEAR/3 disorder* OR Rumination NEAR/3 syndrome OR pica OR allotriophagy OR geophag* OR "Other specified feeding and eating disorder" OR osfed OR "Unspecified feeding and eating disorder" OR ufed OR "Eating disorder not otherwise specified" OR ednos ) <b>AND</b> ( multifamil* OR mult*famil* OR mult* NEAR/2 famil* OR famil* NEAR/1 group* OR mft OR mftg OR mfg OR mfgt ))                                                                                                                                                            |
| SCOPUS                                            | TITLE-ABS-KEY ( "Eating disorder*" OR "Feeding and eating disorder*" OR "feeding W/3 eating disorder*" OR "Appetite disorder*" OR "feeding disorder*" OR "eating and feeding disorder*" OR "eating W/3 feeding disorder*" OR "restrict* W/3 eat*" OR anorexi* OR bulimi* OR arfid OR "Avoidant restrictive food intake disorder" OR bing* OR purg* OR "Night eating syndrome" OR "Rumination W/3 disorder*" OR "Rumination W/3 syndrome" OR pica OR allotriophagy OR geophag* OR "Other specified feeding and eating disorder*" OR osfed OR "Unspecified feeding and eating disorder*" OR ufed OR "Eating disorder not otherwise specified*" OR ednos ) <b>AND</b> ( multifamil* OR mult*famil* OR mult* W/2 famil* OR famil* W/1 group* OR mft OR mftg OR mfg OR mfgt )                                                                                                                                                  |
| Web of Science                                    | (TS=("Eating Disorder*") OR TS=("Feeding and eating disorder*") OR TS=("feeding W/3 eating disorder*") OR TS=("Appetite disorder*") OR TS=("feeding disorder*") OR TS=("eating and feeding disorder*") OR TS=("eating W/3 feeding disorder*") OR TS=("restrict* W/3 eat*") OR TS=(Anorexi*) OR TS=(Bulimi*) OR TS=(ARFID) OR TS=("Avoidant restrictive food intake disorder") OR TS=(Bing*) OR TS=(Purg*) OR TS=("Night eating syndrome") OR TS=("Rumination W/3 disorder*") OR TS=("Rumination W/3 syndrome") OR TS=(Pica) OR TS=(allotriophagy) OR TS=(Geophag*) OR TS=("Other specified feeding and eating disorder*") OR TS=(OSFED) OR TS=("Unspecified feeding and eating disorder*") OR TS=(UFED) OR TS=("Eating disorder not otherwise specified*") OR TS=(EDNOS)) AND (TS=(Multifamil*) OR TS=(Mult*famil*) OR TS=(Mult* W/2 famil*) OR TS=(Famil* W/1 group*) OR TS=(MFT) OR TS=(MFTG) OR TS=(MFG) OR TS=(MFGT)) |

*NB: a separate review protocol was not prepared for this systematic scoping review*
